# Supplementary material
Source: PubMed Central journal article supplement (PMC5538250)
Supplement: NIHMS884940-supplement-Supplemental.pdf [file NIHMS884940-supplement-Supplemental.pdf]

**SUPPLEMENTAL DATA**

This material is an online-only supplement to the following article: Levy SM, Broffitt B, Marshall TA, Eichenberger-Gilmore JM, Warren JJ. Associations between fluorosis of permanent incisors and fluoride intake from infant formula, other dietary sources and dentifrice during early childhood. JADA 2010;141(10):1190-1201. Copyright © 2010 American Dental Association. All rights reserved.

**Appendix 1**

**Median (25th,75th percentile) fluoride intakes (milligrams per day) from major sources at each age according to fluorosis status\* of permanent maxillary incisors.**

| FLUORIDE SOURCE    | CASE PARTICIPANTS |               |              |                      | CONTROL PARTICIPANTS |               |              |                      | P VALUE†    |
|--------------------|-------------------|---------------|--------------|----------------------|----------------------|---------------|--------------|----------------------|-------------|
|                    | N                 | Percent Using | Median       | (25%, 75%)           | N                    | Percent Using | Median       | (25%, 75%)           |             |
| <b>6 Weeks</b>     |                   |               |              |                      |                      |               |              |                      |             |
| Beverages          | 163               | 74            | 0.125        | (0,0.556)            | 359                  | 67            | 0.054        | (0,0.396)            | .07         |
| Selected foods‡    | 163               | 5             | 0            | (0,0)                | 359                  | 9             | 0            | (0,0)                | .08         |
| Supplements        | 163               | 11            | 0            | (0,0)                | 359                  | 14            | 0            | (0,0)                | .43         |
| Dentifrice         | 163               | 0             | 0            | (0,0)                | 359                  | 0             | 0            | (0,0)                | 1.00        |
| Beverages and food | 163               | 74            | 0.126        | (0,0.556)            | 359                  | 68            | 0.054        | (0,0.396)            | .07         |
| <b>TOTAL</b>       | <b>163</b>        | <b>77</b>     | <b>0.156</b> | <b>(0.007,0.559)</b> | <b>359</b>           | <b>74</b>     | <b>0.096</b> | <b>(0,0.404)</b>     | <b>.12</b>  |
| <b>3 Months</b>    |                   |               |              |                      |                      |               |              |                      |             |
| Beverages          | 168               | 85            | 0.240        | (0.047,0.676)        | 354                  | 78            | 0.135        | (0.008,0.521)        | .006        |
| Selected foods‡    | 168               | 28            | 0            | (0,0.001)            | 354                  | 25            | 0            | (0,0)                | .35         |
| Supplements        | 168               | 12            | 0            | (0,0)                | 354                  | 16            | 0            | (0,0)                | .22         |
| Dentifrice         | 168               | 0             | 0            | (0,0)                | 354                  | 0             | 0            | (0,0)                | 1.00        |
| Beverages and food | 168               | 86            | 0.240        | (0.047,0.676)        | 354                  | 79            | 0.135        | (0.009,0.521)        | .006        |
| <b>TOTAL</b>       | <b>168</b>        | <b>88</b>     | <b>0.270</b> | <b>(0.061,0.683)</b> | <b>354</b>           | <b>86</b>     | <b>0.185</b> | <b>(0.029,0.532)</b> | <b>.03</b>  |
| <b>6 Months</b>    |                   |               |              |                      |                      |               |              |                      |             |
| Beverages          | 154               | 96            | 0.402        | (0.131,0.800)        | 346                  | 94            | 0.243        | (0.065,0.638)        | .001        |
| Selected foods‡    | 154               | 89            | 0.003        | (0.002,0.006)        | 344                  | 88            | 0.003        | (0.002,0.006)        | .97         |
| Supplements        | 154               | 12            | 0            | (0,0)                | 346                  | 18            | 0            | (0,0)                | .10         |
| Dentifrice         | 154               | 1             | 0            | (0,0)                | 346                  | 1             | 0            | (0,0)                | .45         |
| Beverages and food | 154               | 99            | 0.406        | (0.134,0.806)        | 346                  | 98            | 0.246        | (0.068,0.644)        | .001        |
| <b>TOTAL</b>       | <b>154</b>        | <b>99</b>     | <b>0.461</b> | <b>(0.169,0.806)</b> | <b>346</b>           | <b>98</b>     | <b>0.284</b> | <b>(0.107,0.649)</b> | <b>.005</b> |

*continued on next page*

**SUPPLEMENTAL DATA**

This material is an online-only supplement to the following article: Levy SM, Broffitt B, Marshall TA, Eichenberger-Gilmore JM, Warren JJ. Associations between fluorosis of permanent incisors and fluoride intake from infant formula, other dietary sources and dentifrice during early childhood. JADA 2010;141(10):1190-1201. Copyright © 2010 American Dental Association. All rights reserved.

**Appendix 1 (cont.)**

| FLUORIDE SOURCE           | CASE PARTICIPANTS |               |              |                      | CONTROL PARTICIPANTS |               |              |                      | P VALUE†          |
|---------------------------|-------------------|---------------|--------------|----------------------|----------------------|---------------|--------------|----------------------|-------------------|
|                           | N                 | Percent Using | Median       | (25%, 75%)           | N                    | Percent Using | Median       | (25%, 75%)           |                   |
| <b>9 Months</b>           |                   |               |              |                      |                      |               |              |                      |                   |
| <b>Beverages</b>          | 153               | 100           | 0.506        | (0.192,0.831)        | 349                  | 100           | 0.266        | (0.105,0.637)        | < .0001           |
| <b>Selected foods‡</b>    | 153               | 84            | 0.005        | (0.002,0.012)        | 348                  | 86            | 0.005        | (0.002,0.010)        | .95               |
| <b>Supplements</b>        | 153               | 10            | 0            | (0,0)                | 349                  | 14            | 0            | (0,0)                | .21               |
| <b>Dentifrice</b>         | 153               | 8             | 0            | (0,0)                | 349                  | 8             | 0            | (0,0)                | .90               |
| <b>Beverages and food</b> | 153               | 100           | 0.531        | (0.195,0.847)        | 349                  | 100           | 0.280        | (0.115,0.655)        | < .0001           |
| <b>TOTAL</b>              | <b>153</b>        | <b>100</b>    | <b>0.541</b> | <b>(0.248,0.870)</b> | <b>349</b>           | <b>100</b>    | <b>0.320</b> | <b>(0.147,0.666)</b> | <b>&lt; .0001</b> |
| <b>12 Months</b>          |                   |               |              |                      |                      |               |              |                      |                   |
| <b>Beverages</b>          | 139               | 100           | 0.268        | (0.154,0.457)        | 320                  | 100           | 0.204        | (0.107,0.386)        | .002              |
| <b>Selected foods‡</b>    | 139               | 80            | 0.019        | (0.002,0.063)        | 314                  | 81            | 0.011        | (0.002,0.047)        | .10               |
| <b>Supplements</b>        | 139               | 9             | 0            | (0,0)                | 320                  | 11            | 0            | (0,0)                | .55               |
| <b>Dentifrice</b>         | 139               | 26            | 0            | (0,0.010)            | 320                  | 27            | 0            | (0,0.008)            | .69               |
| <b>Beverages and food</b> | 139               | 100           | 0.298        | (0.189,0.537)        | 320                  | 100           | 0.239        | (0.123,0.445)        | .001              |
| <b>TOTAL</b>              | <b>139</b>        | <b>100</b>    | <b>0.339</b> | <b>(0.206,0.544)</b> | <b>320</b>           | <b>100</b>    | <b>0.284</b> | <b>(0.159,0.496)</b> | <b>.02</b>        |
| <b>16 Months</b>          |                   |               |              |                      |                      |               |              |                      |                   |
| <b>Beverages</b>          | 137               | 100           | 0.327        | (0.200,0.457)        | 301                  | 100           | 0.235        | (0.136,0.368)        | < .0001           |
| <b>Selected foods‡</b>    | 137               | 87            | 0.038        | (0.009,0.087)        | 294                  | 84            | 0.025        | (0.005,0.076)        | .02               |
| <b>Supplements</b>        | 137               | 5             | 0            | (0,0)                | 301                  | 9             | 0            | (0,0)                | .15               |
| <b>Dentifrice</b>         | 137               | 62            | 0.021        | (0,0.109)            | 301                  | 57            | 0.018        | (0,0.109)            | .48               |
| <b>Beverages and food</b> | 137               | 100           | 0.413        | (0.238,0.558)        | 301                  | 100           | 0.281        | (0.156,0.444)        | < .0001           |
| <b>TOTAL</b>              | <b>137</b>        | <b>100</b>    | <b>0.480</b> | <b>(0.325,0.655)</b> | <b>301</b>           | <b>100</b>    | <b>0.368</b> | <b>(0.208,0.586)</b> | <b>.0001</b>      |

*continued on next page*

**SUPPLEMENTAL DATA**

This material is an online-only supplement to the following article: Levy SM, Broffitt B, Marshall TA, Eichenberger-Gilmore JM, Warren JJ. Associations between fluorosis of permanent incisors and fluoride intake from infant formula, other dietary sources and dentifrice during early childhood. JADA 2010;141(10):1190-1201. Copyright © 2010 American Dental Association. All rights reserved.

**Appendix 1 (cont.)**

| FLUORIDE SOURCE           | CASE PARTICIPANTS |               |              |                      | CONTROL PARTICIPANTS |               |              |                      | P VALUE†     |
|---------------------------|-------------------|---------------|--------------|----------------------|----------------------|---------------|--------------|----------------------|--------------|
|                           | N                 | Percent Using | Median       | (25%, 75%)           | N                    | Percent Using | Median       | (25%, 75%)           |              |
| <b>20 Months</b>          |                   |               |              |                      |                      |               |              |                      |              |
| <b>Beverages</b>          | 126               | 100           | 0.359        | (0.236,0.521)        | 289                  | 100           | 0.310        | (0.185,0.468)        | .03          |
| <b>Selected foods‡</b>    | 126               | 83            | 0.034        | (0.017,0.099)        | 287                  | 83            | 0.026        | (0.006,0.069)        | .07          |
| <b>Supplements</b>        | 126               | 6             | 0            | (0,0)                | 289                  | 7             | 0            | (0,0)                | .52          |
| <b>Dentifrice</b>         | 126               | 81            | 0.109        | (0.018,0.250)        | 289                  | 80            | 0.094        | (0.016,0.219)        | .40          |
| <b>Beverages and food</b> | 126               | 100           | 0.440        | (0.293,0.587)        | 289                  | 100           | 0.359        | (0.217,0.538)        | .007         |
| <b>TOTAL</b>              | <b>126</b>        | <b>100</b>    | <b>0.622</b> | <b>(0.446,0.846)</b> | <b>289</b>           | <b>100</b>    | <b>0.510</b> | <b>(0.330,0.777)</b> | <b>.003</b>  |
| <b>24 Months</b>          |                   |               |              |                      |                      |               |              |                      |              |
| <b>Beverages</b>          | 128               | 100           | 0.318        | (0.228,0.427)        | 278                  | 100           | 0.265        | (0.167,0.409)        | .02          |
| <b>Selected foods‡</b>    | 128               | 97            | 0.077        | (0.040,0.131)        | 278                  | 96            | 0.057        | (0.025,0.105)        | .003         |
| <b>Supplements</b>        | 128               | 7             | 0            | (0,0)                | 278                  | 6             | 0            | (0,0)                | .72          |
| <b>Dentifrice</b>         | 128               | 89            | 0.188        | (0.063,0.438)        | 278                  | 90            | 0.125        | (0.041,0.250)        | .07          |
| <b>Beverages and food</b> | 128               | 100           | 0.420        | (0.292,0.537)        | 278                  | 100           | 0.328        | (0.220,0.489)        | .004         |
| <b>TOTAL</b>              | <b>128</b>        | <b>100</b>    | <b>0.642</b> | <b>(0.474,0.938)</b> | <b>278</b>           | <b>100</b>    | <b>0.533</b> | <b>(0.348,0.793)</b> | <b>.0004</b> |
| <b>28 Months</b>          |                   |               |              |                      |                      |               |              |                      |              |
| <b>Beverages</b>          | 128               | 100           | 0.369        | (0.218,0.534)        | 276                  | 100           | 0.273        | (0.174,0.423)        | .0008        |
| <b>Selected foods‡</b>    | 128               | 97            | 0.070        | (0.041,0.127)        | 276                  | 97            | 0.063        | (0.030,0.109)        | .15          |
| <b>Supplements</b>        | 128               | 7             | 0            | (0,0)                | 276                  | 6             | 0            | (0,0)                | .77          |
| <b>Dentifrice</b>         | 128               | 96            | 0.219        | (0.094,0.438)        | 276                  | 92            | 0.125        | (0.063,0.289)        | .02          |
| <b>Beverages and food</b> | 128               | 100           | 0.431        | (0.287,0.674)        | 276                  | 100           | 0.361        | (0.241,0.550)        | .003         |
| <b>TOTAL</b>              | <b>128</b>        | <b>100</b>    | <b>0.715</b> | <b>(0.492,1.036)</b> | <b>276</b>           | <b>100</b>    | <b>0.609</b> | <b>(0.389,0.855)</b> | <b>.0007</b> |

*continued on next page*

## SUPPLEMENTAL DATA

This material is an online-only supplement to the following article: Levy SM, Broffitt B, Marshall TA, Eichenberger-Gilmore JM, Warren JJ. Associations between fluorosis of permanent incisors and fluoride intake from infant formula, other dietary sources and dentifrice during early childhood. JADA 2010;141(10):1190-1201. Copyright © 2010 American Dental Association. All rights reserved.

### Appendix 1 (cont.)

| FLUORIDE SOURCE           | CASE PARTICIPANTS |               |              |                      | CONTROL PARTICIPANTS |               |              |                      | P VALUE†         |
|---------------------------|-------------------|---------------|--------------|----------------------|----------------------|---------------|--------------|----------------------|------------------|
|                           | N                 | Percent Using | Median       | (25%, 75%)           | N                    | Percent Using | Median       | (25%, 75%)           |                  |
| <b>32 Months</b>          |                   |               |              |                      |                      |               |              |                      |                  |
| <b>Beverages</b>          | 116               | 100           | 0.358        | (0.216,0.528)        | 283                  | 100           | 0.298        | (0.183,0.442)        | .04              |
| <b>Selected foods‡</b>    | 116               | 95            | 0.084        | (0.036,0.131)        | 283                  | 95            | 0.052        | (0.025,0.105)        | .006             |
| <b>Supplements</b>        | 116               | 8             | 0            | (0,0)                | 283                  | 6             | 0            | (0,0)                | .42              |
| <b>Dentifrice</b>         | 116               | 97            | 0.219        | (0.109,0.438)        | 283                  | 94            | 0.217        | (0.063,0.375)        | .02              |
| <b>Beverages and food</b> | 116               | 100           | 0.451        | (0.298,0.644)        | 283                  | 100           | 0.364        | (0.235,0.542)        | .007             |
| <b>TOTAL</b>              | <b>116</b>        | <b>100</b>    | <b>0.779</b> | <b>(0.566,1.039)</b> | <b>283</b>           | <b>100</b>    | <b>0.608</b> | <b>(0.413,0.912)</b> | <b>.0005</b>     |
| <b>36 Months</b>          |                   |               |              |                      |                      |               |              |                      |                  |
| <b>Beverages</b>          | 118               | 100           | 0.391        | (0.286,0.579)        | 282                  | 100           | 0.297        | (0.196,0.487)        | .0002            |
| <b>Selected foods‡</b>    | 118               | 97            | 0.090        | (0.041,0.156)        | 282                  | 95            | 0.058        | (0.025,0.119)        | .0015            |
| <b>Supplements</b>        | 118               | 4             | 0            | (0,0)                | 282                  | 7             | 0            | (0,0)                | .30              |
| <b>Dentifrice</b>         | 118               | 98            | 0.234        | (0.109,0.438)        | 282                  | 94            | 0.125        | (0.063,0.438)        | .005             |
| <b>Beverages and food</b> | 118               | 100           | 0.494        | (0.338,0.763)        | 282                  | 100           | 0.374        | (0.255,0.599)        | .0001            |
| <b>TOTAL</b>              | <b>118</b>        | <b>100</b>    | <b>0.830</b> | <b>(0.649,1.060)</b> | <b>282</b>           | <b>100</b>    | <b>0.667</b> | <b>(0.420,0.924)</b> | <b>&lt;.0001</b> |

\* Fluorosis assessed at approximately age 9 years. Case participants defined as participants with two or more maxillary incisors exhibiting definitive fluorosis (Fluorosis Risk Index score = 2 or 3). Control participants were defined as participants with no definitive fluorosis on maxillary incisors. Participants who had only one maxillary incisor with fluorosis have been excluded from analyses.

† P-value obtained by means of two-tailed Wilcoxon rank sum test;  $P < .01$  considered statistically significant.

‡ Selected foods include infant foods and foods with substantial amounts of added water (such as infant cereal, cooked cereal, soup, rice, pasta, gelatin).

**SUPPLEMENTAL DATA**

This material is an online-only supplement to the following article: Levy SM, Broffitt B, Marshall TA, Eichenberger-Gilmore JM, Warren JJ. Associations between fluorosis of permanent incisors and fluoride intake from infant formula, other dietary sources and dentifrice during early childhood. JADA 2010;141(10):1190-1201. Copyright © 2010 American Dental Association. All rights reserved.

**Appendix 2****Median (25th, 75th percentile) fluoride intakes (milligrams per day) according to beverage category at each age and fluorosis status\* of maxillary incisors.**

| FLUORIDE SOURCE              | CASE PARTICIPANTS |        |        |               | CONTROL PARTICIPANTS |        |        |               | P VALUE <sup>†</sup> |
|------------------------------|-------------------|--------|--------|---------------|----------------------|--------|--------|---------------|----------------------|
|                              | N                 | %Using | Median | (25%,75%)     | N                    | %Using | Median | (25%,75%)     |                      |
| <b>3 Months</b>              |                   |        |        |               |                      |        |        |               |                      |
| Formula                      | 168               | 83     | 0.198  | (0.034,0.650) | 354                  | 75     | 0.103  | (0,0.516)     | .007                 |
| <i>Powdered</i>              | 168               | 60     | 0.034  | (0,0.590)     | 354                  | 51     | 0.002  | (0,0.324)     | .02                  |
| <i>Liquid concentrate</i>    | 168               | 21     | 0      | (0,0)         | 354                  | 20     | 0      | (0,0)         | .80                  |
| <i>Ready-to-feed</i>         | 168               | 12     | 0      | (0,0)         | 354                  | 13     | 0      | (0,0)         | .75                  |
| Other beverages <sup>‡</sup> | 168               | 16     | 0      | (0,0)         | 354                  | 13     | 0      | (0,0)         | .25                  |
| Water by itself              | 168               | 21     | 0      | (0,0)         | 354                  | 19     | 0      | (0,0)         | .72                  |
| <b>6 Months</b>              |                   |        |        |               |                      |        |        |               |                      |
| Formula                      | 154               | 92     | 0.352  | (0.064,0.698) | 346                  | 83     | 0.181  | (0.034,0.541) | .002                 |
| <i>Powdered</i>              | 154               | 70     | 0.089  | (0,0.649)     | 346                  | 60     | 0.034  | (0,0.457)     | .005                 |
| <i>Liquid concentrate</i>    | 154               | 23     | 0      | (0,0)         | 346                  | 21     | 0      | (0,0)         | .49                  |
| <i>Ready-to-feed</i>         | 154               | 5      | 0      | (0,0)         | 346                  | 12     | 0      | (0,0)         | .02                  |
| Other beverages <sup>‡</sup> | 154               | 56     | 0.021  | (0,0.064)     | 346                  | 52     | 0.021  | (0,0.064)     | .44                  |
| Water by itself              | 154               | 35     | 0      | (0,0.022)     | 346                  | 29     | 0      | (0,0.002)     | .12                  |
| <b>9 Months</b>              |                   |        |        |               |                      |        |        |               |                      |
| Formula                      | 153               | 90     | 0.384  | (0.085,0.678) | 349                  | 75     | 0.140  | (0.003,0.535) | .0001                |
| <i>Powdered</i>              | 153               | 71     | 0.238  | (0,0.649)     | 349                  | 58     | 0.034  | (0,0.433)     | .0003                |
| <i>Liquid concentrate</i>    | 153               | 22     | 0      | (0,0)         | 349                  | 17     | 0      | (0,0)         | .22                  |
| <i>Ready-to-feed</i>         | 153               | 4      | 0      | (0,0)         | 349                  | 5      | 0      | (0,0)         | .47                  |
| Cow's milk                   | 153               | 16     | 0      | (0,0)         | 349                  | 35     | 0      | (0,0.001)     | .0001                |
| Other beverages <sup>‡</sup> | 153               | 72     | 0.061  | (0,0.137)     | 349                  | 75     | 0.045  | (0.003,0.102) | .38                  |
| Water by itself              | 153               | 59     | 0.014  | (0,0.065)     | 349                  | 54     | 0.002  | (0,0.038)     | .05                  |

*continued on next page*

**SUPPLEMENTAL DATA**

This material is an online-only supplement to the following article: Levy SM, Broffitt B, Marshall TA, Eichenberger-Gilmore JM, Warren JJ. Associations between fluorosis of permanent incisors and fluoride intake from infant formula, other dietary sources and dentifrice during early childhood. JADA 2010;141(10):1190-1201. Copyright © 2010 American Dental Association. All rights reserved.

**Appendix 2 (cont.)**

| FLUORIDE SOURCE              | CASE PARTICIPANTS |        |        |               | CONTROL PARTICIPANTS |        |        |               | P VALUE <sup>†</sup> |
|------------------------------|-------------------|--------|--------|---------------|----------------------|--------|--------|---------------|----------------------|
|                              | N                 | %Using | Median | (25%,75%)     | N                    | %Using | Median | (25%,75%)     |                      |
| <b>12 Months</b>             |                   |        |        |               |                      |        |        |               |                      |
| Formula                      | 139               | 31     | 0      | (0,0.075)     | 320                  | 30     | 0      | (0,0.035)     | .64                  |
| Powdered                     | 139               | 25     | 0      | (0,0.009)     | 320                  | 22     | 0      | (0,0)         | .38                  |
| Liquid concentrate           | 139               | 6      | 0      | (0,0)         | 320                  | 7      | 0      | (0,0)         | .71                  |
| Ready-to-feed                | 139               | 3      | 0      | (0,0)         | 320                  | 2      | 0      | (0,0)         | .50                  |
| Cow's milk                   | 139               | 88     | 0.009  | (0.003,0.013) | 320                  | 88     | 0.007  | (0.002,0.012) | .29                  |
| Other beverages <sup>‡</sup> | 139               | 91     | 0.111  | (0.054,0.198) | 320                  | 89     | 0.099  | (0.043,0.170) | .16                  |
| Water added                  | 139               | 59     | 0.025  | (0,0.134)     | 320                  | 62     | 0.022  | (0,0.093)     | .38                  |
| Ready-to-feed                | 139               | 63     | 0.043  | (0,0.107)     | 320                  | 57     | 0.021  | (0,0.085)     | .29                  |
| Water by itself              | 139               | 73     | 0.042  | (0,0.122)     | 320                  | 71     | 0.027  | (0,0.089)     | .04                  |
| <b>16 Months</b>             |                   |        |        |               |                      |        |        |               |                      |
| Formula                      | 137               | 5      | 0      | (0,0)         | 301                  | 3      | 0      | (0,0)         | .19                  |
| Cow's milk                   | 137               | 95     | 0.006  | (0.004,0.010) | 301                  | 96     | 0.008  | (0.004,0.011) | .49                  |
| Other beverages <sup>‡</sup> | 137               | 98     | 0.187  | (0.107,0.288) | 301                  | 96     | 0.149  | (0.072,0.234) | .002                 |
| Water added                  | 137               | 75     | 0.093  | (0.006,0.191) | 301                  | 67     | 0.040  | (0,0.112)     | .0002                |
| Ready-to-feed                | 137               | 73     | 0.085  | (0,0.128)     | 301                  | 72     | 0.064  | (0,0.149)     | .83                  |
| Water by itself              | 137               | 86     | 0.095  | (0.030,0.153) | 301                  | 86     | 0.043  | (0.009,0.115) | .0003                |
| <b>20 Months</b>             |                   |        |        |               |                      |        |        |               |                      |
| Cow's milk                   | 126               | 98     | 0.006  | (0.004,0.010) | 289                  | 97     | 0.006  | (0.004,0.010) | .68                  |
| Other beverages <sup>‡</sup> | 126               | 99     | 0.236  | (0.144,0.341) | 289                  | 99     | 0.204  | (0.110,0.337) | .07                  |
| Water added                  | 126               | 73     | 0.082  | (0,0.213)     | 289                  | 77     | 0.075  | (0.008,0.169) | .56                  |
| Ready-to-feed                | 126               | 85     | 0.128  | (0.043,0.192) | 289                  | 81     | 0.085  | (0.043,0.170) | .38                  |
| Water by itself              | 126               | 87     | 0.089  | (0.024,0.189) | 289                  | 87     | 0.059  | (0.013,0.133) | .07                  |
| <b>24 Months</b>             |                   |        |        |               |                      |        |        |               |                      |
| Cow's milk                   | 128               | 100    | 0.005  | (0.004,0.008) | 278                  | 99     | 0.006  | (0.003,0.009) | .40                  |
| Other beverages <sup>‡</sup> | 128               | 99     | 0.203  | (0.129,0.306) | 278                  | 99     | 0.191  | (0.110,0.296) | .25                  |
| Water added                  | 128               | 81     | 0.073  | (0.015,0.158) | 278                  | 77     | 0.048  | (0.004,0.126) | .07                  |
| Ready-to-feed                | 128               | 88     | 0.090  | (0.037,0.183) | 278                  | 83     | 0.088  | (0.024,0.192) | .97                  |
| Water by itself              | 128               | 91     | 0.059  | (0.021,0.146) | 278                  | 90     | 0.054  | (0.013,0.101) | .05                  |

*continued on next page*

**SUPPLEMENTAL DATA**

This material is an online-only supplement to the following article: Levy SM, Broffitt B, Marshall TA, Eichenberger-Gilmore JM, Warren JJ. Associations between fluorosis of permanent incisors and fluoride intake from infant formula, other dietary sources and dentifrice during early childhood. JADA 2010;141(10):1190-1201. Copyright © 2010 American Dental Association. All rights reserved.

**Appendix 2 (cont.)**

| FLUORIDE SOURCE                    | CASE PARTICIPANTS |        |        |               | CONTROL PARTICIPANTS |        |        |               | P VALUE <sup>†</sup> |
|------------------------------------|-------------------|--------|--------|---------------|----------------------|--------|--------|---------------|----------------------|
|                                    | N                 | %Using | Median | (25%,75%)     | N                    | %Using | Median | (25%,75%)     |                      |
| <b>28 Months</b>                   |                   |        |        |               |                      |        |        |               |                      |
| <b>Cow's milk</b>                  | 128               | 99     | 0.005  | (0.004,0.008) | 276                  | 100    | 0.005  | (0.003,0.009) | .71                  |
| <b>Other beverages<sup>‡</sup></b> | 128               | 98     | 0.244  | (0.122,0.368) | 276                  | 100    | 0.190  | (0.113,0.300) | .04                  |
| <b>Water added</b>                 | 128               | 77     | 0.074  | (0.011,0.190) | 276                  | 79     | 0.050  | (0.008,0.144) | .06                  |
| <b>Ready-to-feed</b>               | 128               | 85     | 0.097  | (0.032,0.193) | 276                  | 87     | 0.097  | (0.037,0.173) | .89                  |
| <b>Water by itself</b>             | 128               | 94     | 0.067  | (0.028,0.199) | 276                  | 91     | 0.055  | (0.019,0.118) | .005                 |
| <b>32 Months</b>                   |                   |        |        |               |                      |        |        |               |                      |
| <b>Cow's milk</b>                  | 116               | 100    | 0.005  | (0.003,0.007) | 283                  | 98     | 0.005  | (0.003,0.008) | .19                  |
| <b>Other beverages<sup>‡</sup></b> | 116               | 98     | 0.225  | (0.123,0.373) | 283                  | 99     | 0.204  | (0.116,0.304) | .19                  |
| <b>Water added</b>                 | 116               | 78     | 0.069  | (0.006,0.202) | 283                  | 82     | 0.053  | (0.011,0.159) | .39                  |
| <b>Ready-to-feed</b>               | 116               | 87     | 0.110  | (0.037,0.195) | 283                  | 88     | 0.091  | (0.037,0.195) | .87                  |
| <b>Water by itself</b>             | 116               | 91     | 0.077  | (0.024,0.193) | 283                  | 94     | 0.063  | (0.023,0.135) | .37                  |
| <b>36 Months</b>                   |                   |        |        |               |                      |        |        |               |                      |
| <b>Cow's milk</b>                  | 118               | 98     | 0.004  | (0.003,0.006) | 282                  | 99     | 0.006  | (0.004,0.008) | .006                 |
| <b>Other beverages<sup>‡</sup></b> | 118               | 99     | 0.250  | (0.140,0.381) | 282                  | 99     | 0.183  | (0.112,0.293) | .004                 |
| <b>Water added</b>                 | 118               | 73     | 0.062  | (0,0.192)     | 282                  | 77     | 0.043  | (0.006,0.150) | .20                  |
| <b>Ready-to-feed</b>               | 118               | 89     | 0.122  | (0.061,0.207) | 282                  | 88     | 0.093  | (0.037,0.173) | .14                  |
| <b>Water by itself</b>             | 118               | 92     | 0.103  | (0.042,0.242) | 282                  | 98     | 0.077  | (0.030,0.171) | .07                  |

\* Fluorosis assessed at approximately age 9 years. Case participants defined as participants with two or more maxillary incisors exhibiting definitive fluorosis (Fluorosis Risk Index score = 2 or 3). Control participants were defined as participants with no definitive fluorosis on maxillary incisors. Participants who had only one maxillary incisor with fluorosis have been excluded from analyses.

† P value obtained by means of two-tailed Wilcoxon rank sum test;  $P < .01$  considered statistically significant.

‡ Other beverages include juices, juice drinks, powder-based beverages, sport beverages and soda pop.

###
